# Supplementary material for: Effects of organic ammonium cations on the isolation of {Ti4} cyclic clusters from water: an 17O NMR study
Source: Royal Society of Chemistry journal article supplement (doi:10.1039/d0dt00165a), 2020-01-01
Supplement: d0dt00165a1.pdf [file d0dt00165a1.pdf]

Supporting Information

## Effects of Organic Ammonium Cations on Isolation of $\{\text{Ti}_4\}$ Cyclic Clusters from Water: An $^{17}\text{O}$ NMR Study

*Weiming Liu,<sup>a</sup> Caiyun Liu,<sup>a</sup> Wenli Wu,<sup>b</sup> Guanyun Zhang,<sup>a</sup> Jian Zhang,<sup>c</sup> Chen-Ho Tung<sup>a</sup> and Yifeng Wang<sup>\*a</sup>*

<sup>a</sup> Key Lab for Colloid and Interface Science of Ministry of Education, School of Chemistry and Chemical Engineering, Shandong University, Jinan 250100, China

<sup>b</sup> Qilu University of Technology (Shandong Academy of Sciences), Shandong Analysis and Test Center, Keyuan Street No 19, Jinan 250014, China

<sup>c</sup> State Key Laboratory of Crystal Materials, Shandong University, Jinan 250100, China

## 1. Crystallography

Single crystal X-ray diffraction analysis was performed on a Bruker SMART APEX II diffractometer using Cu-K $\alpha$  radiation ( $\lambda = 1.54178 \text{ \AA}$ ) at 173 K. APEX2, SaintPlus 6.01,<sup>1</sup> SADABS<sup>2</sup> and Olex2<sup>3</sup> were used for indexing, data integration/reduction, absorption correction and refinement. Hydrogen atoms of the organic ammonium cations were added as riding atoms theoretically. The crystallographic data are list in the following table:

**Table S1.** The crystallographic data

| Compound                                     | Ti <sub>4</sub> b-CHexDA                                                                                                                                                                       | Ti <sub>4</sub> b-BuDA                                                                                                                                                                         | Ti <sub>4</sub> c-OcDA                                                                                                                                                                                                       | Ti <sub>4</sub> c-HMTA                                                                                                              |
|----------------------------------------------|------------------------------------------------------------------------------------------------------------------------------------------------------------------------------------------------|------------------------------------------------------------------------------------------------------------------------------------------------------------------------------------------------|------------------------------------------------------------------------------------------------------------------------------------------------------------------------------------------------------------------------------|-------------------------------------------------------------------------------------------------------------------------------------|
| Formula unit                                 | C <sub>12</sub> H <sub>48</sub> N <sub>4</sub> O <sub>36</sub> S <sub>6</sub> Ti <sub>4</sub>                                                                                                  | C <sub>8</sub> H <sub>44</sub> N <sub>4</sub> O <sub>36</sub> S <sub>6</sub> Ti <sub>4</sub>                                                                                                   | C <sub>36</sub> H <sub>114.5</sub> Cl <sub>1.5</sub> N <sub>9</sub> O <sub>45</sub> S <sub>8.5</sub> Ti <sub>4</sub>                                                                                                         | H <sub>36</sub> O <sub>50</sub> S <sub>8</sub> Ti <sub>4</sub>                                                                      |
| CCDC number                                  | 1977579                                                                                                                                                                                        | 1977578                                                                                                                                                                                        | 1977580                                                                                                                                                                                                                      | 1977581                                                                                                                             |
| Moieties                                     | (C <sub>6</sub> H <sub>16</sub> N <sub>2</sub> ) <sub>2</sub> [Ti <sub>4</sub> O <sub>4</sub> (OH <sub>2</sub> ) <sub>8</sub> (SO <sub>4</sub> ) <sub>4</sub> ](SO <sub>4</sub> ) <sub>2</sub> | (C <sub>4</sub> H <sub>14</sub> N <sub>2</sub> ) <sub>2</sub> [Ti <sub>4</sub> O <sub>4</sub> (OH <sub>2</sub> ) <sub>8</sub> (SO <sub>4</sub> ) <sub>4</sub> ](SO <sub>4</sub> ) <sub>2</sub> | (C <sub>8</sub> H <sub>22</sub> N <sub>2</sub> ) <sub>4.5</sub> [Ti <sub>4</sub> O <sub>4</sub> (OH <sub>2</sub> ) <sub>4</sub> (SO <sub>4</sub> ) <sub>8</sub> ](SO <sub>4</sub> ) <sub>0.5</sub> ·1.5HCl·3H <sub>2</sub> O | [Ti <sub>4</sub> O <sub>4</sub> (OH <sub>2</sub> ) <sub>4</sub> (SO <sub>4</sub> ) <sub>8</sub> H <sub>8</sub> ]·10H <sub>2</sub> O |
| Formula weight (g/mol)                       | 1208.4                                                                                                                                                                                         | 1156.3                                                                                                                                                                                         | 1911.0                                                                                                                                                                                                                       | 1284.2                                                                                                                              |
| Crystal system                               | tetragonal                                                                                                                                                                                     | tetragonal                                                                                                                                                                                     | triclinic                                                                                                                                                                                                                    | tetragonal                                                                                                                          |
| Space group (Nr.)                            | I4/mcm                                                                                                                                                                                         | I4/mcm                                                                                                                                                                                         | P-1                                                                                                                                                                                                                          | I-42d                                                                                                                               |
| a (Å)                                        | 13.7675(2)                                                                                                                                                                                     | 13.8316(2)                                                                                                                                                                                     | 15.4295(4)                                                                                                                                                                                                                   | 24.0919(2)                                                                                                                          |
| b (Å)                                        | 13.7675(2)                                                                                                                                                                                     | 13.8316(2)                                                                                                                                                                                     | 17.3585(5)                                                                                                                                                                                                                   | 24.0919(2)                                                                                                                          |
| c (Å)                                        | 20.9391(4)                                                                                                                                                                                     | 20.2120(4)                                                                                                                                                                                     | 18.1126(4)                                                                                                                                                                                                                   | 23.1592(3)                                                                                                                          |
| $\alpha$ (°)                                 | 90                                                                                                                                                                                             | 90                                                                                                                                                                                             | 109.769(2)                                                                                                                                                                                                                   | 90                                                                                                                                  |
| $\beta$ (°)                                  | 90                                                                                                                                                                                             | 90                                                                                                                                                                                             | 90.193(2)                                                                                                                                                                                                                    | 90                                                                                                                                  |
| $\gamma$ (°)                                 | 90                                                                                                                                                                                             | 90                                                                                                                                                                                             | 109.105(2)                                                                                                                                                                                                                   | 90                                                                                                                                  |
| Volume (Å <sup>3</sup> )                     | 3968.88(14)                                                                                                                                                                                    | 3866.82(14)                                                                                                                                                                                    | 4278.1(2)                                                                                                                                                                                                                    | 13442.1(3)                                                                                                                          |
| Z                                            | 1                                                                                                                                                                                              | 4                                                                                                                                                                                              | 1                                                                                                                                                                                                                            | 12                                                                                                                                  |
| Density <sub>calc</sub> (g/cm <sup>3</sup> ) | 2.022                                                                                                                                                                                          | 1.959                                                                                                                                                                                          | 1.482                                                                                                                                                                                                                        | 1.892                                                                                                                               |
| Abs. Coeff. $\mu$ (mm <sup>-1</sup> )        | 10.700                                                                                                                                                                                         | 10.944                                                                                                                                                                                         | 6.253                                                                                                                                                                                                                        | 10.586                                                                                                                              |
| Temperature (K)                              | 173                                                                                                                                                                                            | 173                                                                                                                                                                                            | 173                                                                                                                                                                                                                          | 173                                                                                                                                 |
| Total reflections                            | 5055                                                                                                                                                                                           | 5413                                                                                                                                                                                           | 42809                                                                                                                                                                                                                        | 17257                                                                                                                               |
| Min-max 2 $\theta$ (°)                       | 9.084 to 152.578                                                                                                                                                                               | 8.75 to 152.536                                                                                                                                                                                | 5.228 to 153.256                                                                                                                                                                                                             | 5.294 to 144.96                                                                                                                     |
| Unique reflections                           | 1094                                                                                                                                                                                           | 1080                                                                                                                                                                                           | 16946                                                                                                                                                                                                                        | 6388                                                                                                                                |
| R <sub>1</sub> [ $I \geq 2\sigma(I)$ ]       | 0.0858                                                                                                                                                                                         | 0.0995                                                                                                                                                                                         | 0.1504                                                                                                                                                                                                                       | 0.0439                                                                                                                              |
| wR <sub>2</sub> (all data)                   | 0.1897                                                                                                                                                                                         | 0.2269                                                                                                                                                                                         | 0.4155                                                                                                                                                                                                                       | 0.1175                                                                                                                              |
| R <sub>int</sub>                             | 0.0407                                                                                                                                                                                         | 0.0393                                                                                                                                                                                         | 0.1331                                                                                                                                                                                                                       | 0.0328                                                                                                                              |
| Goodness of fit on F <sup>2</sup>            | 1.228                                                                                                                                                                                          | 1.129                                                                                                                                                                                          | 1.045                                                                                                                                                                                                                        | 1.082                                                                                                                               |
| Parameters                                   | 131                                                                                                                                                                                            | 149                                                                                                                                                                                            | 987                                                                                                                                                                                                                          | 401                                                                                                                                 |
| Restraints                                   | 108                                                                                                                                                                                            | 187                                                                                                                                                                                            | 303                                                                                                                                                                                                                          | 359                                                                                                                                 |
| Largest diff. peak/hole (e Å <sup>-3</sup> ) | 0.78/-0.76                                                                                                                                                                                     | 1.34/-0.77                                                                                                                                                                                     | 1.65/-1.26                                                                                                                                                                                                                   | 0.54/-0.46                                                                                                                          |

## 2. Additional characterization

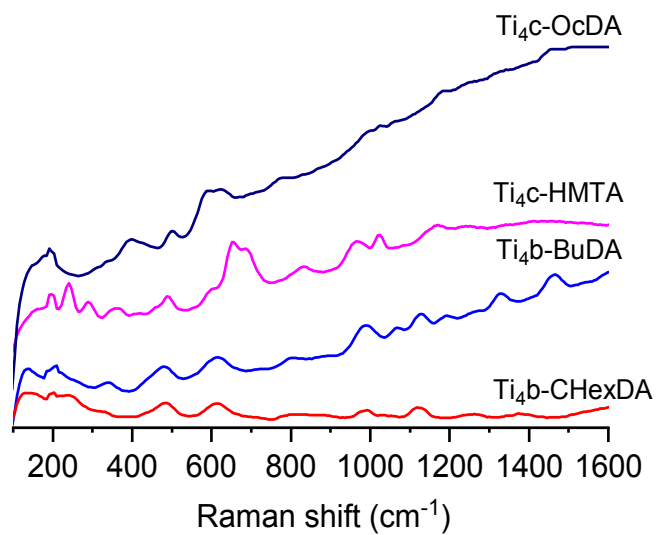

**Figure S1.** The Raman spectra of the  $\{\text{Ti}_4\}$  compounds.

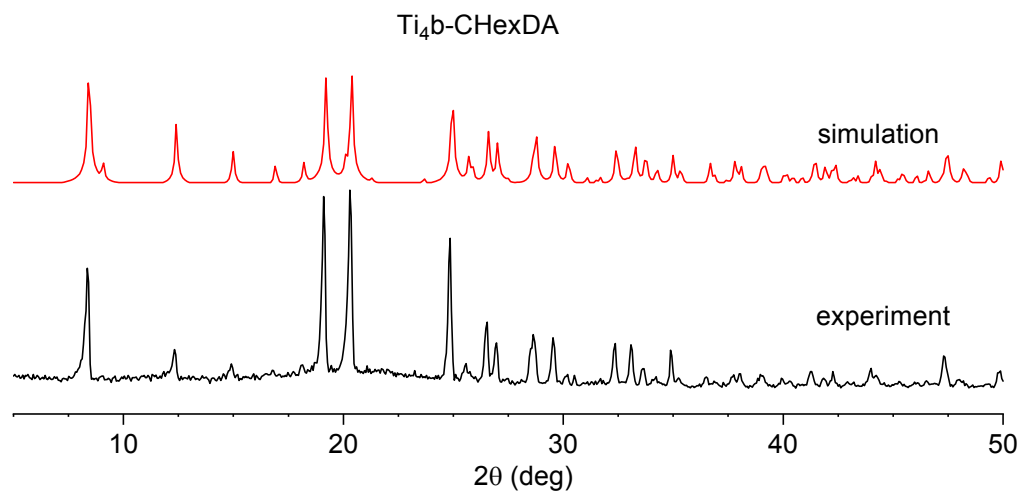

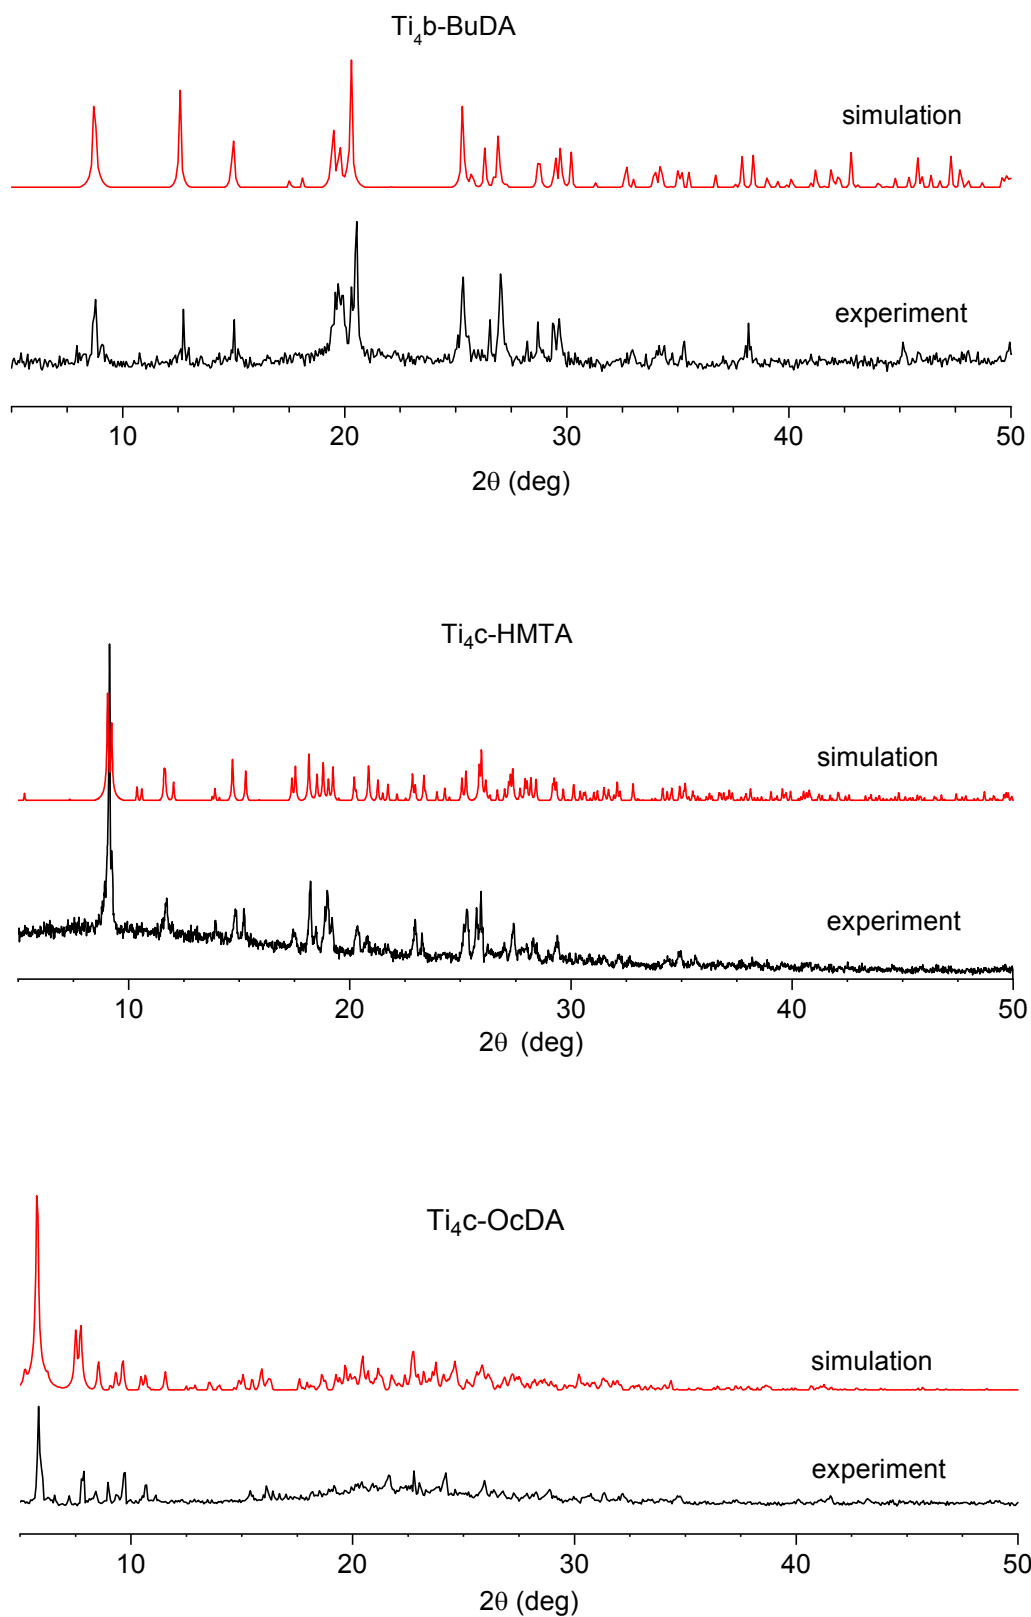

**Figure S2.** The PXRD spectra of the  $\{Ti_4\}$  compounds.

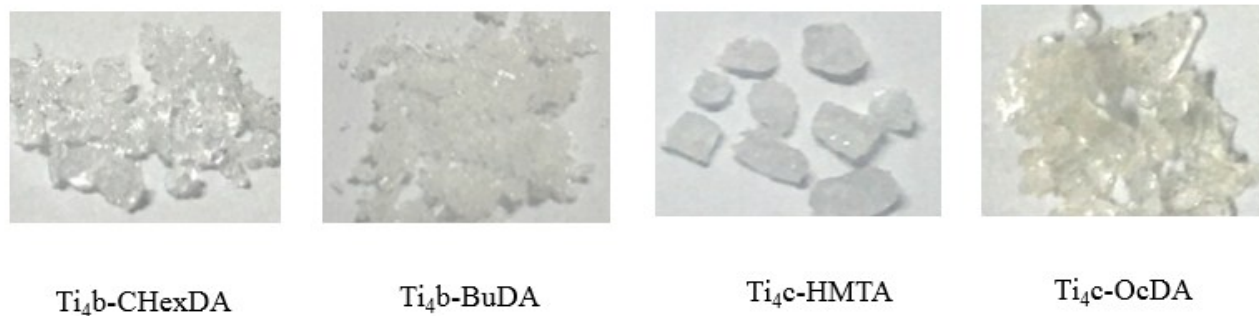

**Figure S3.** The photos of the crystals.

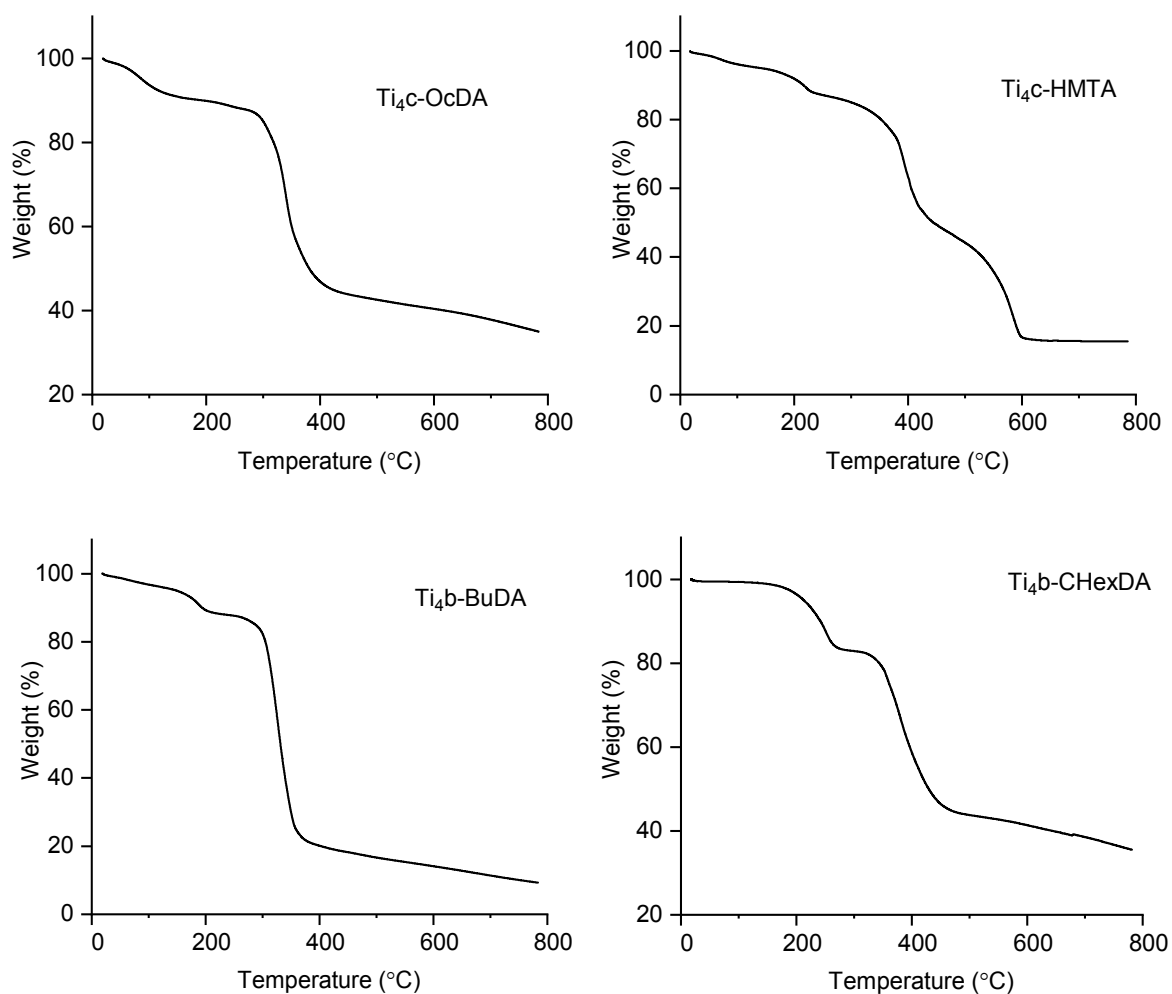

**Figure S4.** TGA data. The data were recorded on an SDT Q600 instrument from room temperature to ca. 800 °C at a heating rate of 10 °C min<sup>-1</sup>, under high purity N<sub>2</sub> flow (100 mL min<sup>-1</sup>).

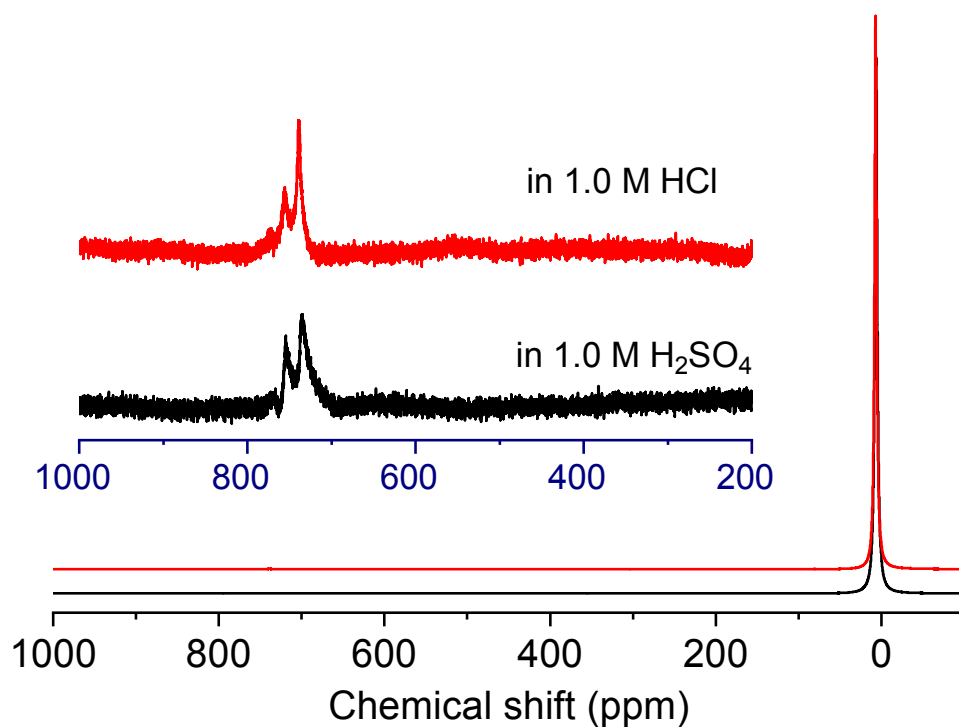

**Figure S5.** The  $^{17}\text{O}$  NMR spectra of  $\text{Ti}_4\text{c-OcDA}$  (ca. 0.10 M) dissolved in 1.0 M HCl or  $\text{H}_2\text{SO}_4$ .

**Discussion.** For above experiments,  $^{17}\text{O}$ -enriched  $\text{Ti}_4\text{c-OcDA}$  was first prepared using an  $^{17}\text{O}$ -enriched solution (5%).  $^{17}\text{O}$ -enriched  $\text{Ti}_4\text{c-OcDA}$  was then dissolved in 5%  $^{17}\text{O}$ -enriched 1.0 M HCl or  $\text{H}_2\text{SO}_4$ . The concentration of  $\text{Ti}_4\text{c-OcDA}$  was ca. 0.10 M. Thus, the concentration of  $\text{Ti}^{4+}$  was ca. 0.40 M. The three peaks of  $\mu_2\text{-O}$  suggest  $\text{Ti}_4\text{c}$  decomposed in prior to the NMR measurements. Moreover, according to the peak area analysis, the concentrations of  $\mu_2\text{-O}$  are estimated to be 0.11 and 0.10 M in the two solutions, respectively. The much lower concentrations of  $\mu_2\text{-O}$  than that of  $\text{Ti}^{4+}$  clearly indicate  $\text{Ti}_4\text{c}$  decomposed.

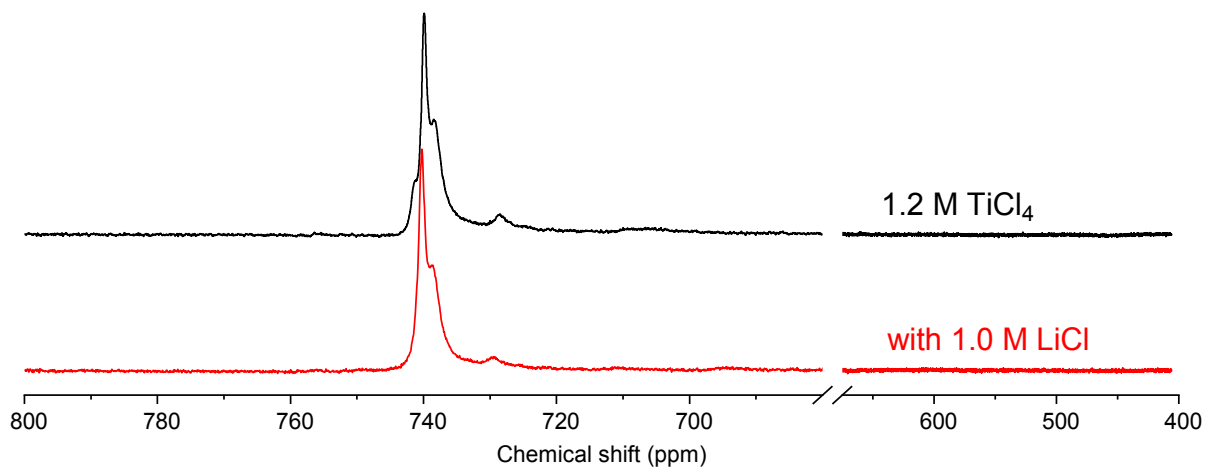

**Figure S6.**  $^{17}\text{O}$  NMR spectra of  $\text{TiCl}_4$  with and without added  $\text{LiCl}$ . It can be seen that  $\text{LiCl}$  leads to little change to the speciation.

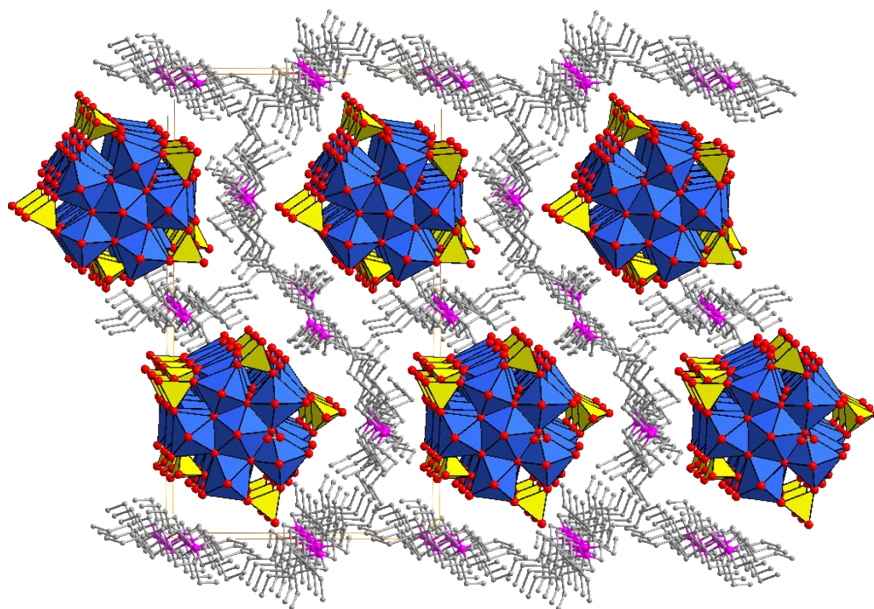

**Figure S7.** The packing diagram of  $\{\text{Ti}_{18}\text{O}_{27}\}$  clusters in  $\{\text{Ti}_{18}\text{O}_{27}\}$ -TBAC.<sup>4</sup> The  $\text{TBA}^+$  cations assemble into a “honeycomb” for accommodating the  $\{\text{Ti}_{18}\text{O}_{27}\}$  clusters,  $\text{Cl}^-$  anions and solvent  $\text{H}_2\text{O}$ .

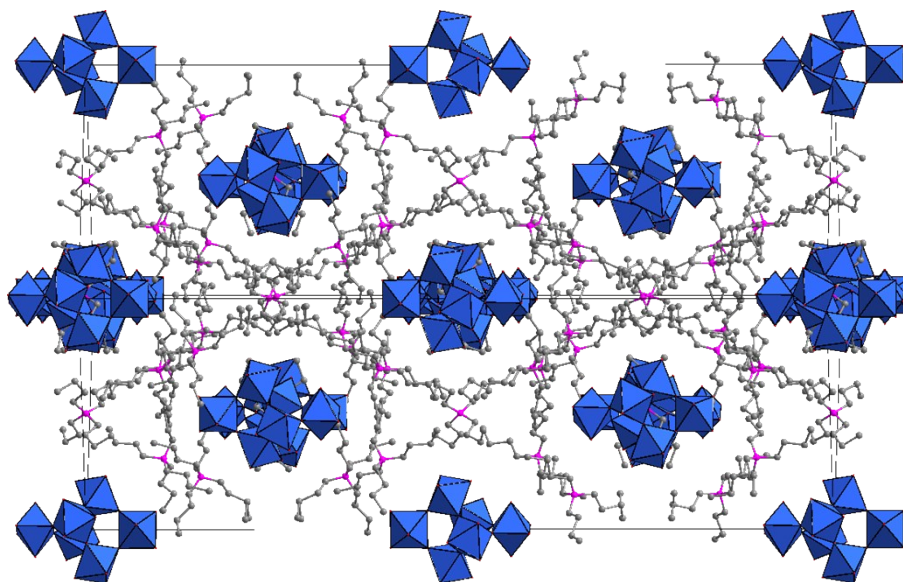

**Figure S8.** The packing diagram of  $\{\text{Ti}_6\text{O}_8\}$  cluster in  $\text{Ti}_6$ -TBAC.<sup>5</sup> The  $\text{TBA}^+$  cations are organized into hydrophobic shells and inside the shells are located the  $\{\text{Ti}_6\text{O}_8\}$  cluster,  $\text{Cl}^-$  and solvent  $\text{H}_2\text{O}$ .

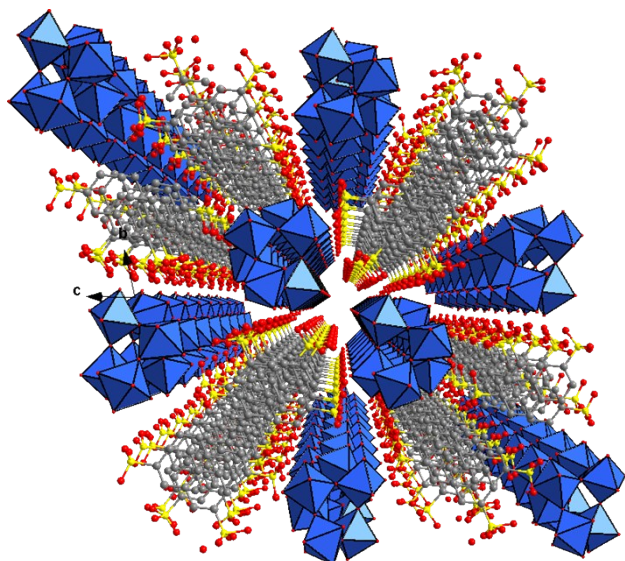

**Figure S9.** The packing diagram of  $\{\text{Ti}_6\text{O}_8\}$  clusters in  $\{\text{Ti}_6\text{O}_8\}$ -NDS. The  $\{\text{Ti}_6\text{O}_8\}$  clusters are separated by many one-dimensional chain-like fabrics of the assembled 2,7-naphthalenedisulfonate.

### 3. References

- (1) SaintPlus: Data Reduction and Correction Program, version 6.22; Bruker AXS: Madison, WI, **2001**.
- (2) Sheldrick, G. M. SADABS, A Program for Empirical Absorption Correction; University of Göttingen: Göttingen, Germany, **1998**.
- (3) Dolomanov, O. V.; Bourhis, L. J.; Gildea, R. J.; Howard, J. A. K.; Puschmann, H. Olex2: a Complete Structure Solution, Refinement and Analysis Program. *J. Appl. Crystallogr.* **2009**, *42*, 339-341.
- (4) Zhang, G.; Liu, C.; Long, D.-L.; Cronin, L.; Tung, C.-H.; Wang, Y. Water-Soluble Pentagonal-Prismatic Titanium-Oxo Clusters. *J. Am. Chem. Soc.* **2016**, *138*, 11097-11100.
- (5) Zhang, G.; Hou, J.; Li, M.; Tung, C.-H.; Wang, Y. Counteranion-Stabilized Titanium(IV) Isopolyoxocationic Clusters Isolated from Water. *Inorg. Chem.* **2016**, *55*, 4704-4709.
